# Supplementary material for: Effects and Safety of a Novel Oral Potassium-Lowering Drug-Sodium Zirconium Cyclosilicate for the Treatment of Hyperkalemia: a Systematic Review and Meta-Analysis
Source: PubMed Central journal article supplement (PMC8452568; doi:10.1007/s10557-020-07134-2), 2021-01-18
Supplement: 10557_2020_7134_MOESM1_ESM.pdf [file 10557_2020_7134_MOESM1_ESM.pdf]

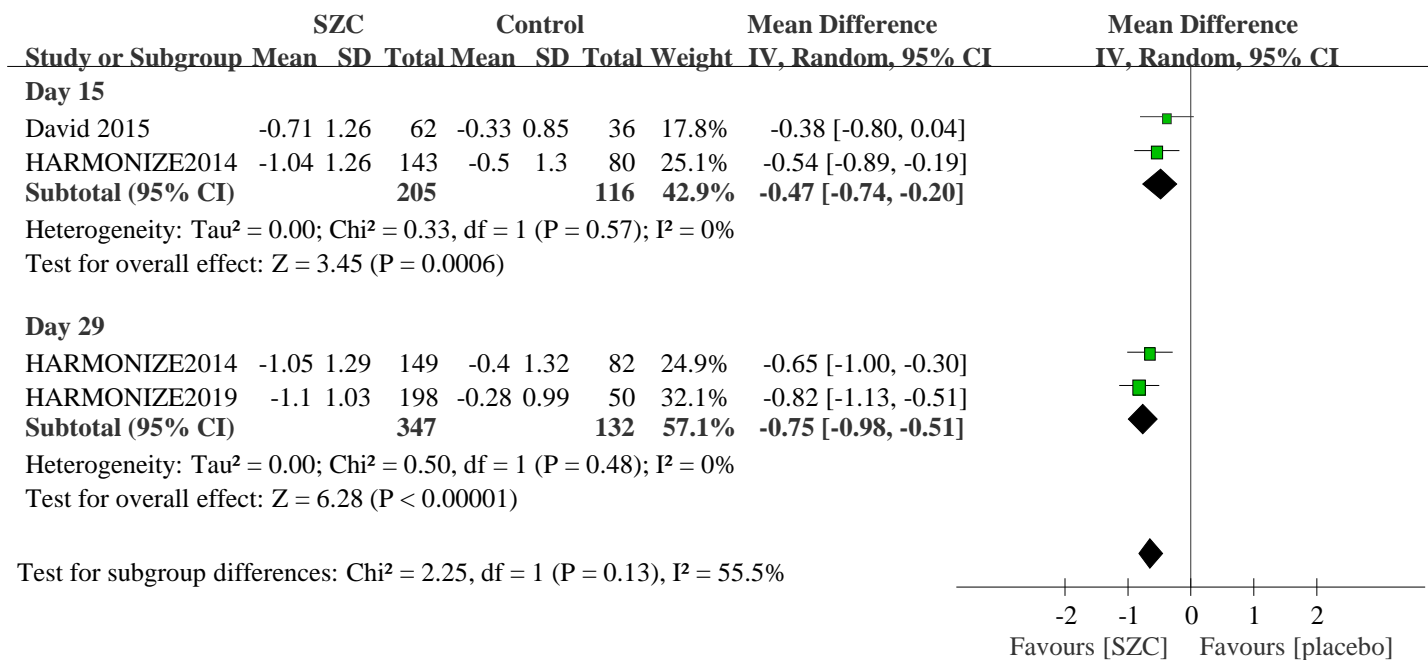

Supplement Figure 1. Time-related subgroup analysis of change in serum potassium (sK<sup>+</sup>) between SZC and placebo group at maintenance phase. SZC, Sodium zirconium cyclosilicate.

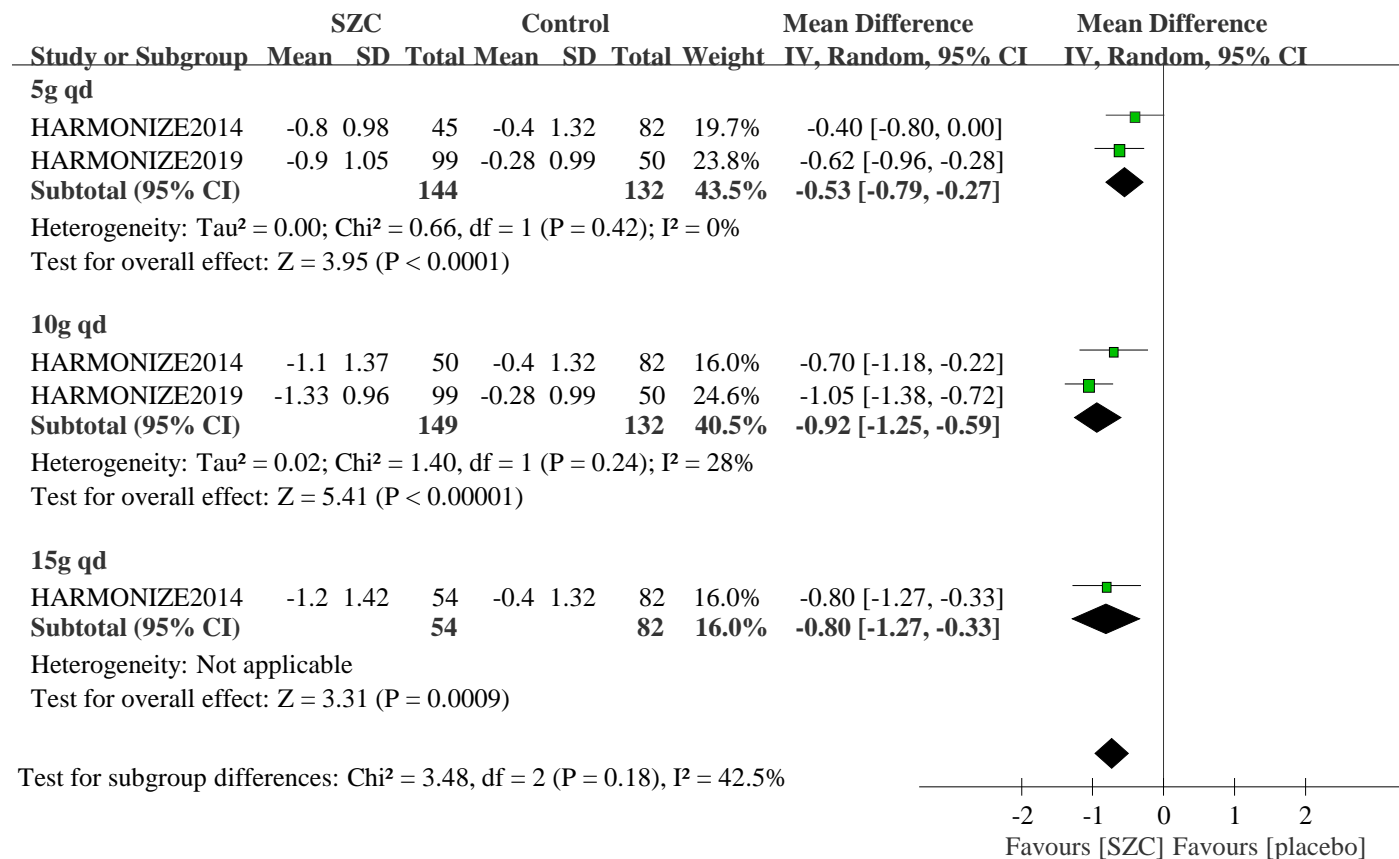

Supplement Figure 2. Subgroup analysis of different doses in the change of serum potassium (sK<sup>+</sup>) between the SZC and placebo group at maintenance phase; SZC, Sodium zirconium cyclosilicate; qd: once daily.

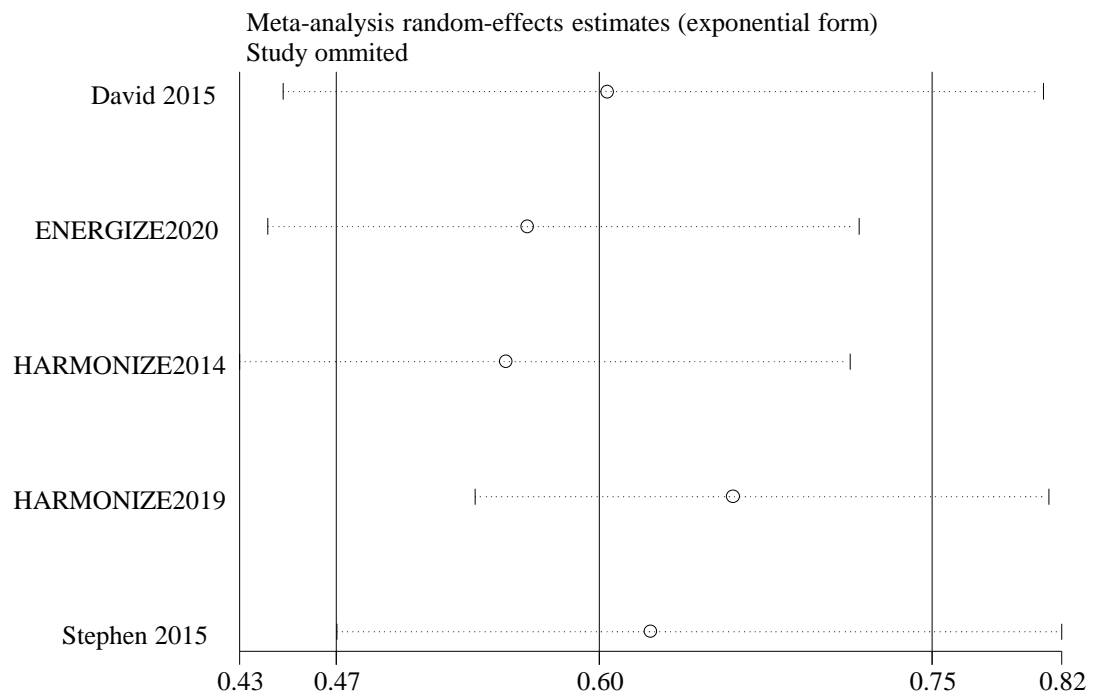

Supplement Figure 3. Sensitivity analysis for change in serum potassium (sK<sup>+</sup>) between the SZC and placebo group.

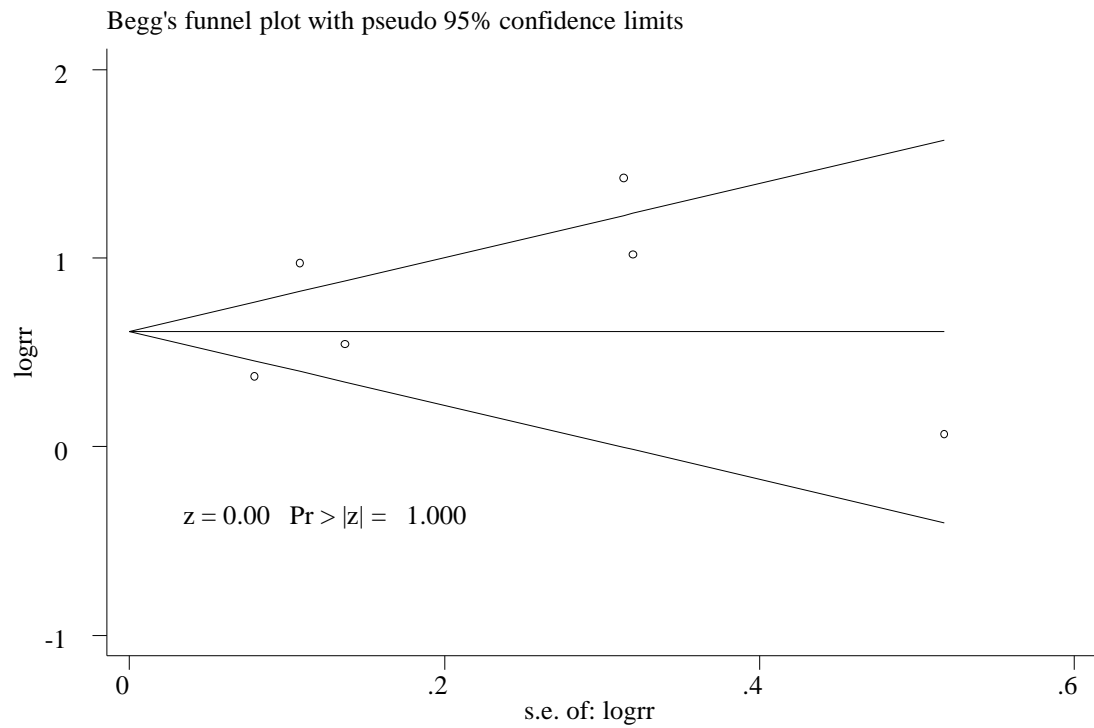

Supplement Figure 4. Begg's funnel plot of proportions of responders with normokalemia between the SZC and placebo group.

Table S1. Inherent risk of bias of included trials

| Trial          | Sequence generation | Allocation concealment | Blinding     |           |                   | Incomplete outcome data | Selective outcome reporting | Other source of bias |
|----------------|---------------------|------------------------|--------------|-----------|-------------------|-------------------------|-----------------------------|----------------------|
|                |                     |                        | participants | personnel | outcome assessors |                         |                             |                      |
| David 2015     | UNCLEAR             | UNCLEAR                | LOW          | LOW       | LOW               | LOW                     | UNCLEAR                     | UNCLEAR              |
| DIALIZE 2019   | LOW                 | LOW                    | LOW          | LOW       | LOW               | LOW                     | LOW                         | UNCLEAR              |
| ENERGIZE 2020  | LOW                 | LOW                    | LOW          | LOW       | LOW               | LOW                     | LOW                         | UNCLEAR              |
| HARMONIZE2014  | LOW                 | LOW                    | LOW          | LOW       | LOW               | LOW                     | LOW                         | UNCLEAR              |
| HARMONIZE 2015 | LOW                 | LOW                    | LOW          | LOW       | LOW               | LOW                     | LOW                         | UNCLEAR              |
| HARMONIZE 2019 | LOW                 | LOW                    | LOW          | LOW       | LOW               | LOW                     | LOW                         | UNCLEAR              |
| Kashihara2020  | LOW                 | LOW                    | LOW          | LOW       | LOW               | LOW                     | LOW                         | UNCLEAR              |
| Stephen 2015   | LOW                 | UNCLEAR                | LOW          | LOW       | LOW               | LOW                     | LOW                         | UNCLEAR              |

Assessment of risk bias according to the Cochrane collaboration tool, low risk of bias was represented as “LOW” and high risk of were “HIGH”.
